# Supplementary material
Source: PubMed Central journal article supplement (PMC10528114)
Supplement: NIHMS1920717-supplement-Supplemental_Material.pdf [file NIHMS1920717-supplement-Supplemental_Material.pdf]

**Supplemental Table S1.***PID-5 Facet Descriptive Statistics, t-tests, and Cohen's d Effect Sizes across Race*

| PID-5 Facets                | Black Americans (n = 613) |           | White Americans (n = 612) |           | <i>t</i> | <i>d</i> |
|-----------------------------|---------------------------|-----------|---------------------------|-----------|----------|----------|
|                             | <i>M</i>                  | <i>SD</i> | <i>M</i>                  | <i>SD</i> |          |          |
| <b>Negative Affectivity</b> |                           |           |                           |           |          |          |
| Anxiousness                 | 1.29                      | 0.67      | 1.47                      | 0.75      | -4.36*   | 0.25     |
| Emotional Lability          | 1.05                      | 0.69      | 1.16                      | 0.73      | -2.78    | 0.16     |
| Hostility                   | 1.02                      | 0.60      | 1.02                      | 0.59      | 0.17     | -0.01    |
| Perseveration               | 0.92                      | 0.60      | 1.07                      | 0.62      | -4.33*   | 0.25     |
| Restricted Affectivity (R)  | 1.03                      | 0.63      | 1.00                      | 0.67      | 0.87     | -0.05    |
| Separation Anxiety          | 0.90                      | 0.65      | 1.05                      | 0.71      | -3.84*   | 0.22     |
| Submissiveness              | 0.94                      | 0.64      | 1.28                      | 0.68      | -9.01*   | 0.52     |
| <b>Detachment</b>           |                           |           |                           |           |          |          |
| Anhedonia                   | 0.89                      | 0.57      | 0.92                      | 0.63      | -0.86    | 0.05     |
| Depressivity                | 0.64                      | 0.62      | 0.76                      | 0.66      | -3.33    | 0.19     |
| Intimacy Avoidance          | 0.75                      | 0.63      | 0.64                      | 0.64      | 3.01     | -0.17    |
| Suspiciousness              | 1.21                      | 0.50      | 1.08                      | 0.57      | 4.42*    | -0.25    |
| Withdrawal                  | 1.00                      | 0.61      | 0.98                      | 0.67      | 0.50     | -0.03    |
| <b>Antagonism</b>           |                           |           |                           |           |          |          |
| Attention Seeking           | 0.99                      | 0.63      | 1.09                      | 0.68      | -2.60    | 0.15     |
| Callousness                 | 0.64                      | 0.55      | 0.55                      | 0.53      | 2.95     | -0.17    |
| Deceitfulness               | 0.83                      | 0.59      | 0.86                      | 0.62      | -1.00    | 0.06     |
| Grandiosity                 | 0.99                      | 0.59      | 0.82                      | 0.59      | 4.92*    | -0.28    |
| Manipulativeness            | 1.00                      | 0.69      | 1.04                      | 0.71      | -0.85    | 0.05     |
| <b>Disinhibition</b>        |                           |           |                           |           |          |          |
| Distractibility             | 0.97                      | 0.65      | 1.16                      | 0.69      | -4.76*   | 0.27     |
| Impulsivity                 | 0.92                      | 0.63      | 0.95                      | 0.65      | -1.04    | 0.06     |
| Irresponsibility            | 0.65                      | 0.56      | 0.66                      | 0.58      | -0.06    | 0.00     |
| Rigid Perfectionism (R)     | 1.13                      | 0.62      | 1.23                      | 0.71      | -2.61    | 0.15     |
| Risk-Taking                 | 1.29                      | 0.43      | 1.35                      | 0.52      | -2.24    | 0.13     |
| <b>Psychoticism</b>         |                           |           |                           |           |          |          |
| Eccentricity                | 1.01                      | 0.72      | 1.23                      | 0.79      | -5.12*   | 0.29     |
| Perceptual Dysregulation    | 0.76                      | 0.59      | 0.80                      | 0.59      | -1.26    | 0.07     |
| Unusual Beliefs             | 0.85                      | 0.64      | 0.81                      | 0.64      | 1.09     | -0.06    |

Note. *t* = *t*-statistic for independent samples *t*-test across White American and Black American groups; *d*

= Cohen's *d* effect size for between group mean differences. \**p* < .001. Facets listed under the domain in which they were initially proposed to load on primarily. (R) = Item is keyed negatively onto the domain.

**Supplemental Table S2.***Configural ESEM Models across White and Black Americans*

| Model                                | $\chi^2$ | df  | CFI   | RMSEA (90% CI)      | SRMR  |
|--------------------------------------|----------|-----|-------|---------------------|-------|
| ESEM BA Group Separate ( $n = 613$ ) | 786.4    | 185 | 0.933 | 0.073 (0.068-0.079) | 0.028 |
| ESEM WA Group Separate ( $n = 612$ ) | 1090.8   | 185 | 0.895 | 0.089 (0.084-0.095) | 0.029 |
| ESEM Combined Sample ( $n = 1225$ )  | 1817.5   | 185 | 0.906 | 0.085 (0.081-0.088) | 0.027 |
| 1. Configural                        | 1883.6   | 370 | 0.915 | 0.082 (0.078-0.085) | 0.028 |

*Note.* WA = White American; BA = Black American. CFI = comparative fit index; RMSEA = root mean square error of approximation; SRMR = Standardized Root Mean-square Residual.

**Supplemental Table S3.***ESEM Measurement Invariance Testing across White and Black Americans with Two Intercepts Released*

| Model                            | $\chi^2$ | df  | CFI   | $\Delta$ CFI | RMSEA (90% CI)      | $\Delta$<br>RMSEA | AIC    | $\Delta$ AIC | BIC    | $\Delta$ BIC | Comparison |
|----------------------------------|----------|-----|-------|--------------|---------------------|-------------------|--------|--------------|--------|--------------|------------|
| 1. Configural                    | 1,883.6  | 370 | 0.915 |              | 0.082 (0.078-0.085) |                   | 38,281 |              | 39,968 |              |            |
| 2. Weak                          | 2,057.0  | 470 | 0.911 | 0.004        | 0.074 (0.071-0.078) | -0.008            | 38,401 | 119.4        | 39,576 | -391.6       | Model 1    |
| 3. Weak + Item                   | 2,179.6  | 495 | 0.905 | 0.006        | 0.075 (0.071-0.078) | 0.001             | 38,506 | 105.4        | 39,554 | -22.4        | 2          |
| 4. Weak + FVCV                   | 2,126.1  | 485 | 0.907 | 0.004        | 0.074 (0.071-0.078) | 0.000             | 38,444 | 44.0         | 39,543 | -32.7        | 2          |
| 5. Partial Strong                | 2,161.0  | 488 | 0.906 | 0.005        | 0.075 (0.072-0.078) | 0.001             | 38,470 | 69.1         | 39,553 | -22.9        | 2          |
| 6. Weak + FVCV + Item            | 2,255.0  | 510 | 0.902 | 0.009        | 0.075 (0.072-0.078) | 0.001             | 38,570 | 169.4        | 39,541 | -35.0        | 2          |
| 7. Partial Strict                | 2,288.8  | 513 | 0.900 | 0.006        | 0.075 (0.072-0.078) | 0.000             | 38,576 | 106.0        | 39,531 | -21.7        | 5          |
| 8. Partial Strong + FVCV         | 2,230.4  | 503 | 0.903 | 0.003        | 0.075 (0.072-0.078) | 0.000             | 38,515 | 45.0         | 39,522 | -31.6        | 5          |
| 9. Partial Strict + FVCV         | 2,363.8  | 528 | 0.897 | 0.003        | 0.075 (0.072-0.078) | 0.000             | 38,650 | 74.5         | 39,519 | -12.2        | 7          |
| 10. Partial Strong + LFMn        | 2,223.5  | 493 | 0.902 | 0.004        | 0.076 (0.073-0.079) | 0.001             | 38,532 | 61.8         | 39,589 | 36.3         | 5          |
| 11. Partial Strict + LFMn        | 2,349.1  | 518 | 0.897 | 0.003        | 0.076 (0.073-0.079) | 0.001             | 38,637 | 61.6         | 39,568 | 36.1         | 7          |
| 12. Partial Strong + LFMn + FVCV | 2,292.5  | 508 | 0.899 | 0.007        | 0.076 (0.073-0.079) | 0.001             | 38,577 | 107.0        | 39,558 | 4.8          | 5          |
| 13. Partial Strict + LFMn + FVCV | 2,423.8  | 533 | 0.893 | 0.007        | 0.076 (0.073-0.079) | 0.001             | 38,702 | 126.1        | 39,555 | 23.9         | 7          |

*Note.* Partial invariance by releasing the intercepts for Submissiveness and Suspiciousness. CFI = comparative fit index; RMSEA = root mean square error of approximation; CI = confidence interval; AIC = Akaike Information Criteria; BIC = Bayesian Information Criteria; Item = invariance of item/facet uniquenesses (i.e., residual variance); FVCV = invariance of factor variances/covariances; LFMn = invariance of latent factor means. Support for the more parsimonious model requires a change in CFI and RMSEA that does not exceed .01 (Chen, 2007; Marsh et al., 2009).
